# Supplementary material
Source: publisher figshare collection journal article supplement (https://acs.figshare.com/ndownloader/files/3721069)
Supplement: Supplementary file 1 [file 3721069]

# **Synthesis and Physicochemical Properties of Double-Chain Cationic Surfactants**

**Sinem Engin Özdil<sup>a</sup>, Halide Akbaş<sup>b,\*</sup>, Mesut Boz<sup>b</sup>**

*a. Department of Chemistry, İpsala Vocational Collage, Trakya University, Edirne, TURKEY*

*b,\*. Department of Chemistry, Faculty of Science, Trakya University, Edirne, TURKEY*

\* Address of corresponding Author

Prof. Dr. Halide Akbaş

**Department of Chemistry, Faculty of Science**

**Trakya University, 22030, Edirne, TURKEY**

Fax: +90 284 2351198, Tel: +90 534 4110563

**E-mail:** hakbas34@yahoo.com

Supporting Information C :  $^1\text{H}$  NMR Spectra and  $^{13}\text{C}$  NMR Spectra of 12-0-12

$^1\text{H}$  NMR Spectra and  $^{13}\text{C}$  NMR Spectra of 16-0-16

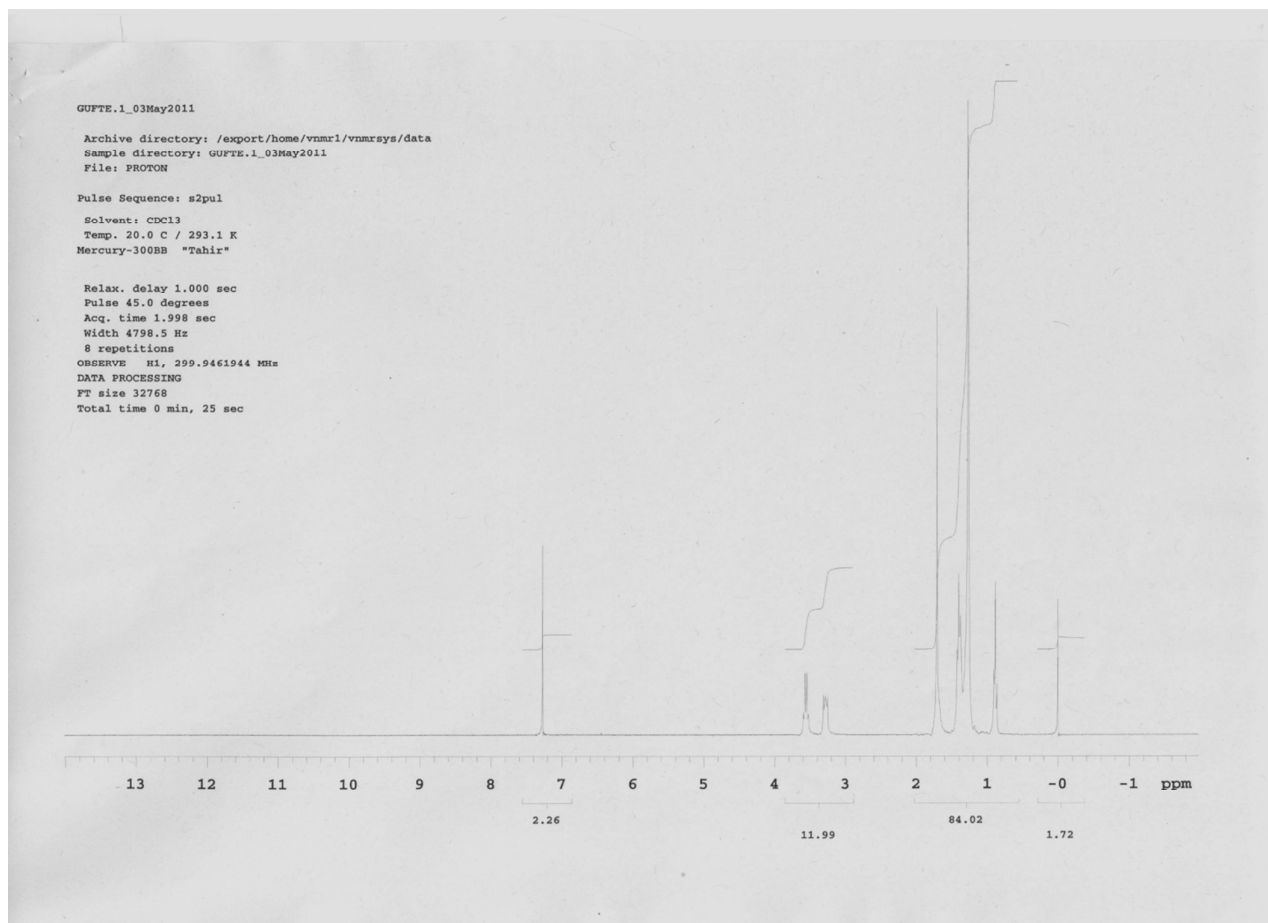

**Figure S4a.**  $^1\text{H}$  NMR Spectra of 12-0-12

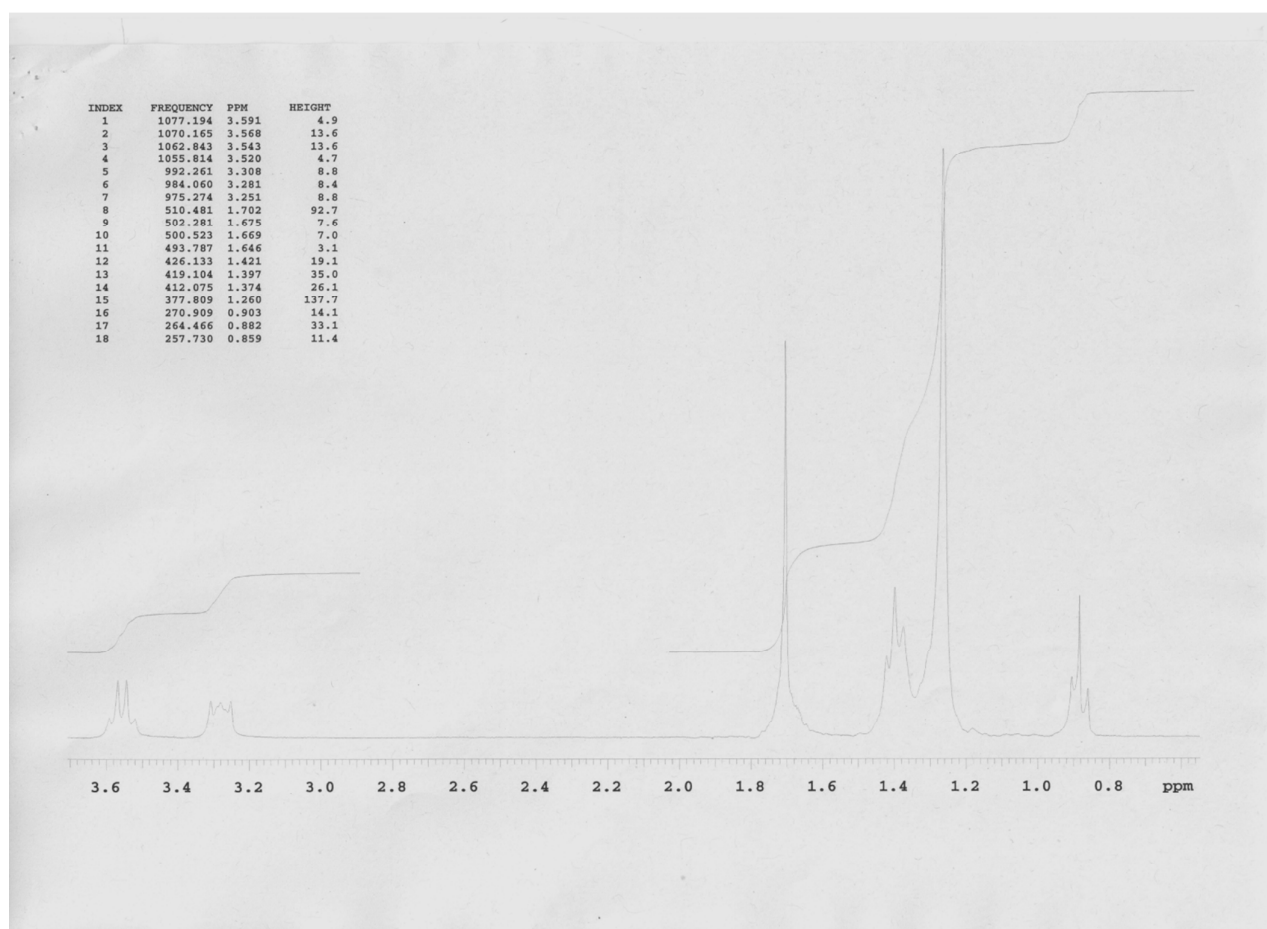

**Figure S4b.** <sup>1</sup>H NMR Spectra of 12-0-12

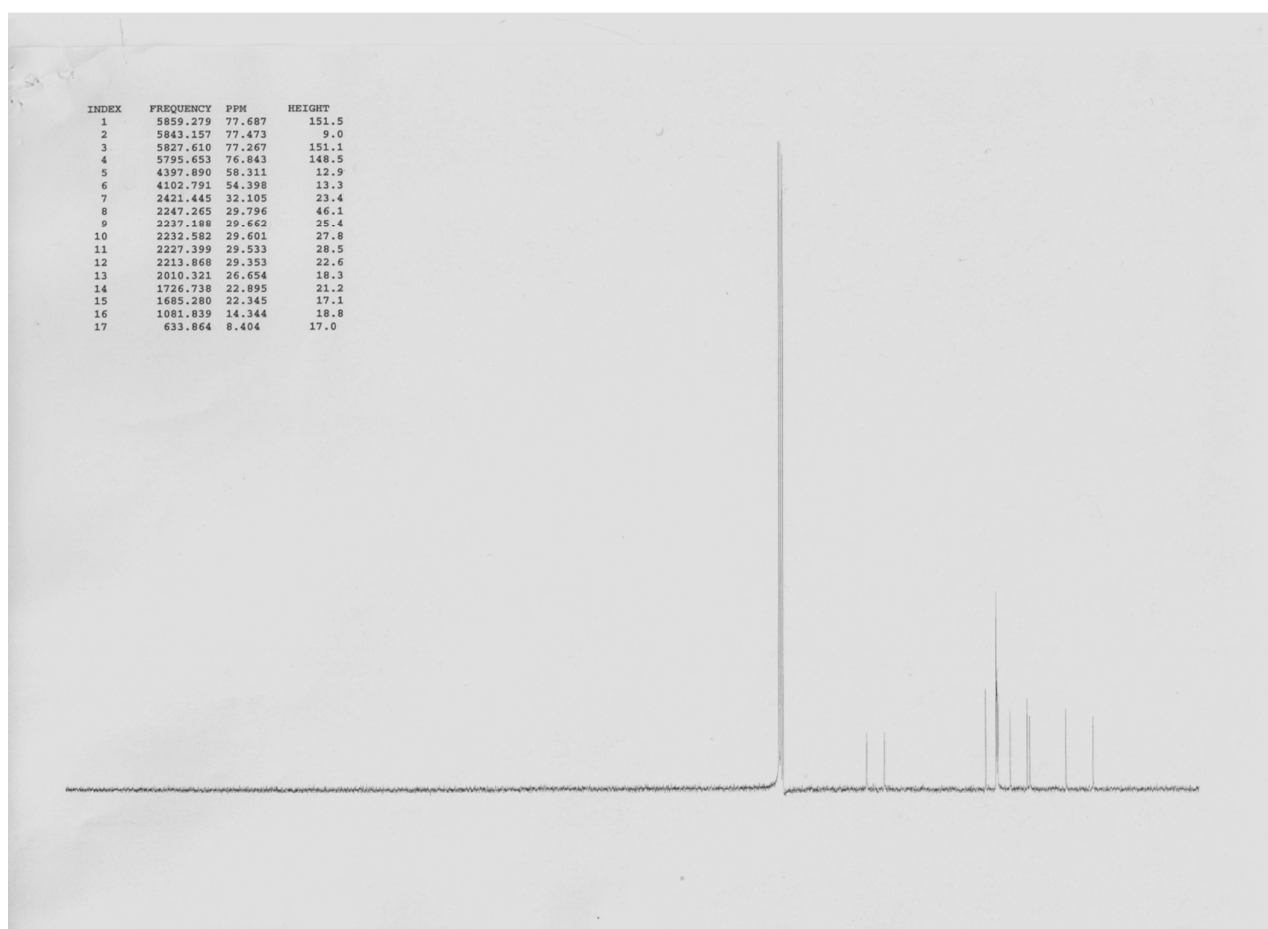

**Figure S4c.** <sup>13</sup>C NMR Spectra of 12-0-12

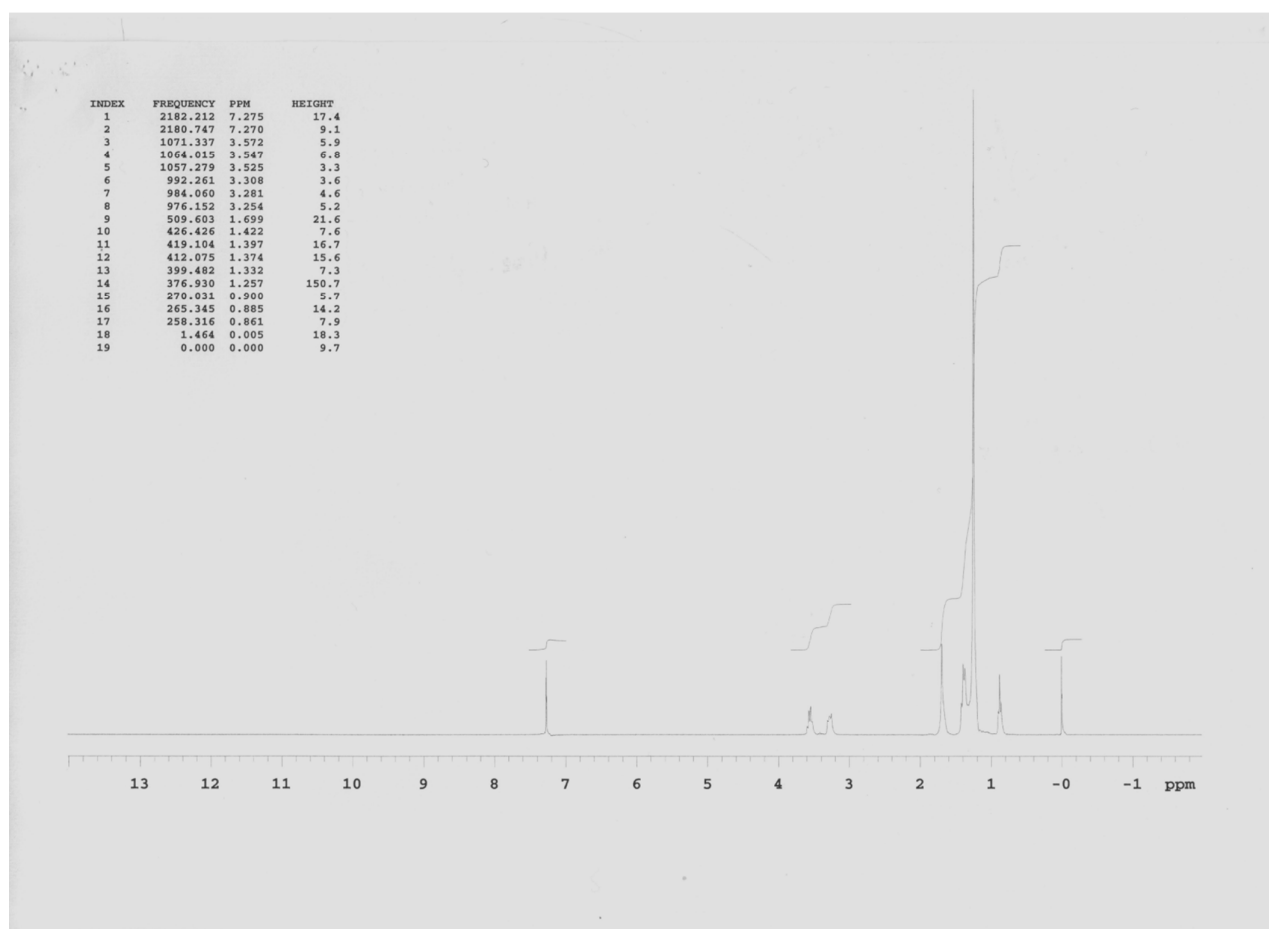

**Figure S5a.**  $^1\text{H}$  NMR Spectra of 16-0-16

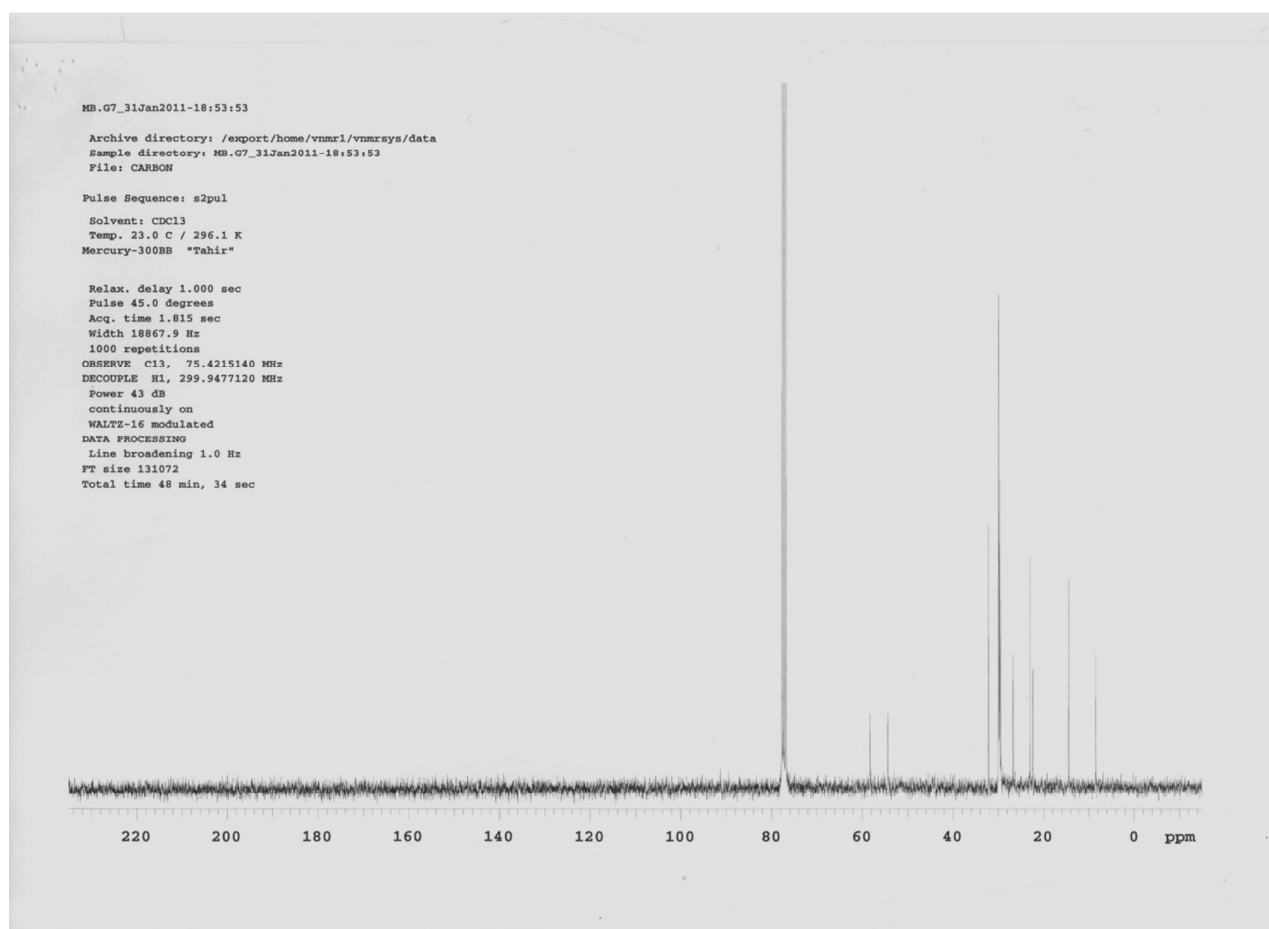

**Figure S5b.** <sup>13</sup>C NMR Spectra of 16-0-16

The purities of double-chain cationic surfactants m-0-m (m=10,12 and 16) are estimated to be  $\geq 99.5$  mol % from their  $^1\text{H}$  NMR spectra. Because, there are no integral relating to any foreign proton.

On the other hand, the purity of the gemini surfactant 12-2-12 are estimated to be 97 mol % from  $^1\text{H}$  NMR spectra. The one impurity is the starting material N,N,N',N'-tetramethylethylenediamine and the peaks come from its hydrogen are observed in 2.3-2.5 ppm. The purity of the gemini surfactant 12-2-12 was determined by the integral ratio of this proton to total integral of all hydrogen atoms. The purity of the gemini surfactant 16-2-16 are estimated to be 98,5 mol % from  $^1\text{H}$  NMR spectra. The one impurity is the same of 12-2-12 (N,N,N',N'-tetramethylethylenediamine) and the peaks come from its hydrogen are observed in 2.3-2.5 ppm. The purity of the gemini surfactant 16-2-16 was determined by the integral ratio of this proton to total integral of all hydrogen atoms.
